# Supplementary material for: Greenhouse gas emissions from boreal inland waters unchanged after forest harvesting
Source: Copernicus journal article supplement (doi:10.5194/bg-15-5575-2018), 2018-09-19
Supplement: Supplementary file 2 [file bg-15-5575-2018-supplement.zip]

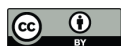

## *Supplement of*

# **Greenhouse gas emissions from boreal inland waters unchanged after forest harvesting**

**Marcus Klaus et al.**

*Correspondence to:* Marcus Klaus ([marcus.klaus@posteo.net](mailto:marcus.klaus@posteo.net))

- [bg-15-5575-2018-supplement-title-page.pdf](#)
- [Klaus\\_BIOGEOSCIENCES\\_SUPPL\\_MAT\\_REVISIED\\_clean.pdf](#)
- [Suppl\\_File\\_S1\\_DATA\\_Fig3.xlsx](#)
- [Suppl\\_File\\_S2\\_DATA\\_Fig4.txt](#)
- [Suppl\\_File\\_S3\\_DATA\\_Fig5.txt](#)
- [Suppl\\_File\\_S4\\_DATA\\_Fig6\\_7.xlsx](#)
- [Suppl\\_File\\_S5\\_DATA\\_Fig8.xlsx](#)

The copyright of individual parts of the supplement might differ from the CC BY 4.0 License.
